# Supplementary material for: Impact of a strong volcanic eruption on the summer middle atmosphere in UA-ICON simulations
Source: Copernicus journal article supplement (doi:10.5194/acp-23-7001-2023), 2023-06-23
Supplement: Supplementary file 1 [file acp-23-7001-2023-supplement.pdf]

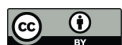

*Supplement of*

## **Impact of a strong volcanic eruption on the summer middle atmosphere in UA-ICON simulations**

**Sandra Wallis et al.**

*Correspondence to:* Sandra Wallis ([sandra.wallis@uni-greifswald.de](mailto:sandra.wallis@uni-greifswald.de))

The copyright of individual parts of the supplement might differ from the article licence.

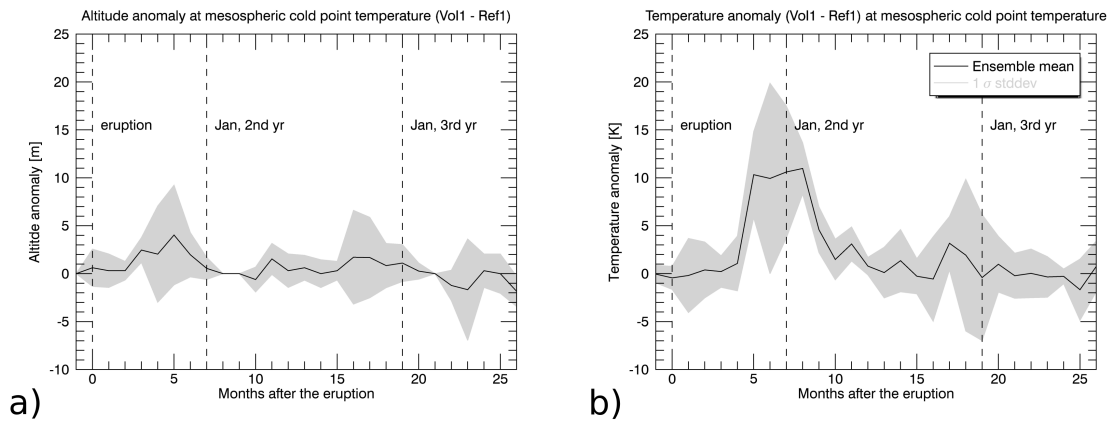

**Figure S1.** Time series of the (a) altitude and (b) temperature anomaly of the mesospheric cold point. Gray shading indicates 1 standard deviation of the 10 ensemble member anomalies (Vol1 - Ref1). The date of the eruption as well as of the first and second post-eruption Novembers are marked with dash lines.

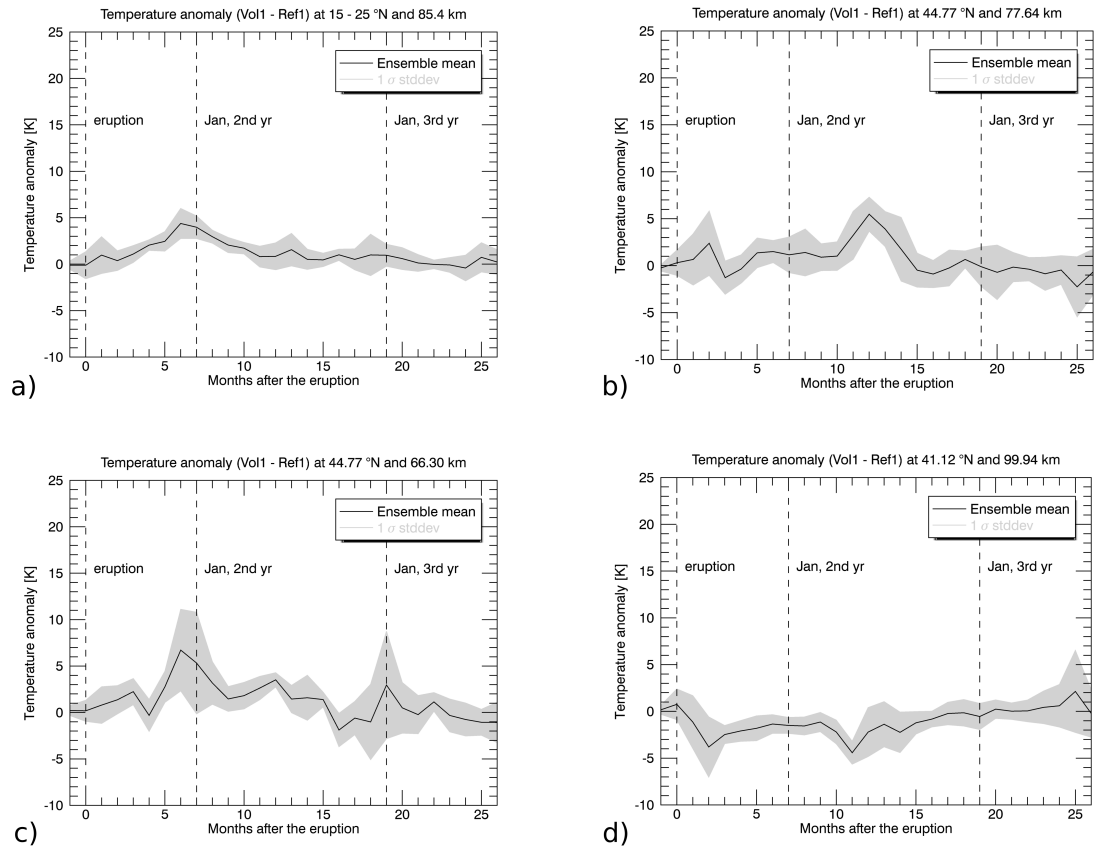

**Figure S2.** Time series of temperature anomaly (Vol1 - Ref1) for a) 15-25°N and 85.4 km altitude, b) 44.77°N and 77.64 km altitude, c) 44.77°N and 66.30 km altitude and d) 41.12°N and 99.94 km altitude. The gray areas in b)-d) indicate the 1- $\sigma$  standard deviation. The gray areas in a) show the mean of the ensemble mean temperature anomaly standard deviations for all latitudes averaged between 15-25°N.

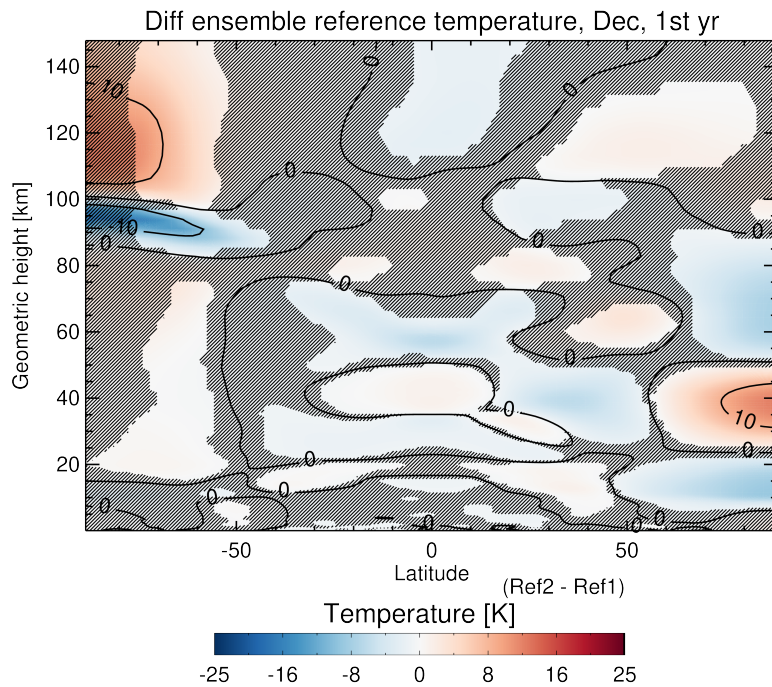

**Figure S3.** Difference of the reference runs (Ref2 - Ref1) for the first December after the simulated eruption. The reference runs differ in the sub-grid scale orographic parameterization. The summer mesopause region between 85 - 100 km altitude shows a negative anomaly that is significant between 80 - 40°S. The polar winter stratosphere between 20 - 50 km shows a positive anomaly with a negative anomaly above up to 90 km altitude. Hatched areas are not significant at a 95% confidence interval using a Student's t-test.
